# Supplementary material
Source: HighWire-hosted journal article supplement (https://srh.bmj.com/content/48/e1/e53)
Supplement: inline-supplementary-material-2 [file inline-supplementary-material-2.pdf]

Supplementary Table 1. Population attributable fraction (PAF, %) of preconception maternal/paternal drinking for miscarriage.

| Risk Factors      | Miscarriage             | Population Attributable Fraction* |           |        |
|-------------------|-------------------------|-----------------------------------|-----------|--------|
|                   | n/N (%)                 | PAF (%)                           | 95% CI    | P      |
| Couple's Drinking | 38,283/1,279,911 (2.99) | 4.27                              | 3.91-4.63 | <0.001 |
| Maternal drinking | 3,834/117,391 (3.27)    | 0.55                              | 0.45-0.65 | <0.001 |
| Paternal drinking | 37,284/1,248,719 (2.99) | 4.06                              | 3.70-4.41 | <0.001 |
